# Supplementary material for: Development of the Japanese Version of Pregnancy-Related Anxiety Questionnaire—Revised-2: Measurement and Psychometric Properties
Source: MDPI journal article supplement (doi:10.3390/healthcare11131935), 2023-07-04
Supplement: s1 [file s1]

**Table S2.** Semi-structured questions in the cognitive interview.

| Topics           | Questions                                                                                                                                                                                             |
|------------------|-------------------------------------------------------------------------------------------------------------------------------------------------------------------------------------------------------|
| Instructions     | Were the instructions easy to understand?                                                                                                                                                             |
| Response options | Were the response options easy to understand?                                                                                                                                                         |
| Each item        | How did you feel when asked this question?<br>Was this question difficult to answer?<br>Did you feel distressed, confused, or flustered?<br>Is this question relevant to your pregnancy or treatment? |
| Overall scale    | How did you feel about answering this questionnaire?<br>Can you think of any other important items to include?<br>Do you have any other comments about this questionnaire?                            |
