# Supplementary material for: Development of the Japanese Version of Pregnancy-Related Anxiety Questionnaire—Revised-2: Measurement and Psychometric Properties
Source: MDPI journal article supplement (doi:10.3390/healthcare11131935), 2023-07-04
Supplement: s1 [file s1]

**Table S1.** Participant characteristics of cognitive interviews (N=6).

| Age<br>(years) | GA<br>(weeks) | Facility               | Number<br>of<br>deliveries | Number<br>of<br>abortions | IVF | Job              | Education           | Economic<br>comfort | Participa<br>ting<br>prenatal<br>class | Risk        |
|----------------|---------------|------------------------|----------------------------|---------------------------|-----|------------------|---------------------|---------------------|----------------------------------------|-------------|
| 34             | 31            | Hospital               | 0                          | 0                         | Yes | Full-time worker | University          | Some                | Yes                                    | NA          |
| 29             | 24            | University<br>hospital | 0                          | 0                         | No  | Full-time worker | University          | Not much            | No                                     | Been abused |
| 33             | 33            | Clinic                 | 0                          | 2                         | Yes | Contract worker  | University          | Not much            | Yes                                    | Fibroid     |
| 36             | 23            | Hospital               | 1                          | 3                         | No  | Full-time worker | University          | Not much            | No                                     | NA          |
| 27             | 31            | Clinic                 | 0                          | 0                         | No  | Full-time worker | University          | Not much            | Yes                                    | NA          |
| 36             | 26            | Hospital               | 0                          | 0                         | No  | Full-time worker | Technical<br>school | Some                | Yes                                    | NA          |

GA, gestational age; IVF, in vitro fertilization.
